# Supplementary material for: Effective Population Size, Gene Flow, and Species Status in a Narrow Endemic Sunflower, Helianthus neglectus, Compared to Its Widespread Sister Species, H. petiolaris
Source: MDPI journal article supplement (doi:10.3390/ijms11020492), 2010-02-02

**Supplementary File S1:** Neighbor joining trees and 50% majority-rule bootstrap consensus neighbor joining trees for all loci. Bootstrap trees are based on 1,000 replicates. Trees are rooted with sequences from *Bahiopsis lanata* and/or *B. reticulata*. Population names for *H. petiolaris* and *H. neglectus* sequences correspond to names given in Table 6 of the main text.

Locus (2213)  
neighbor joining tree

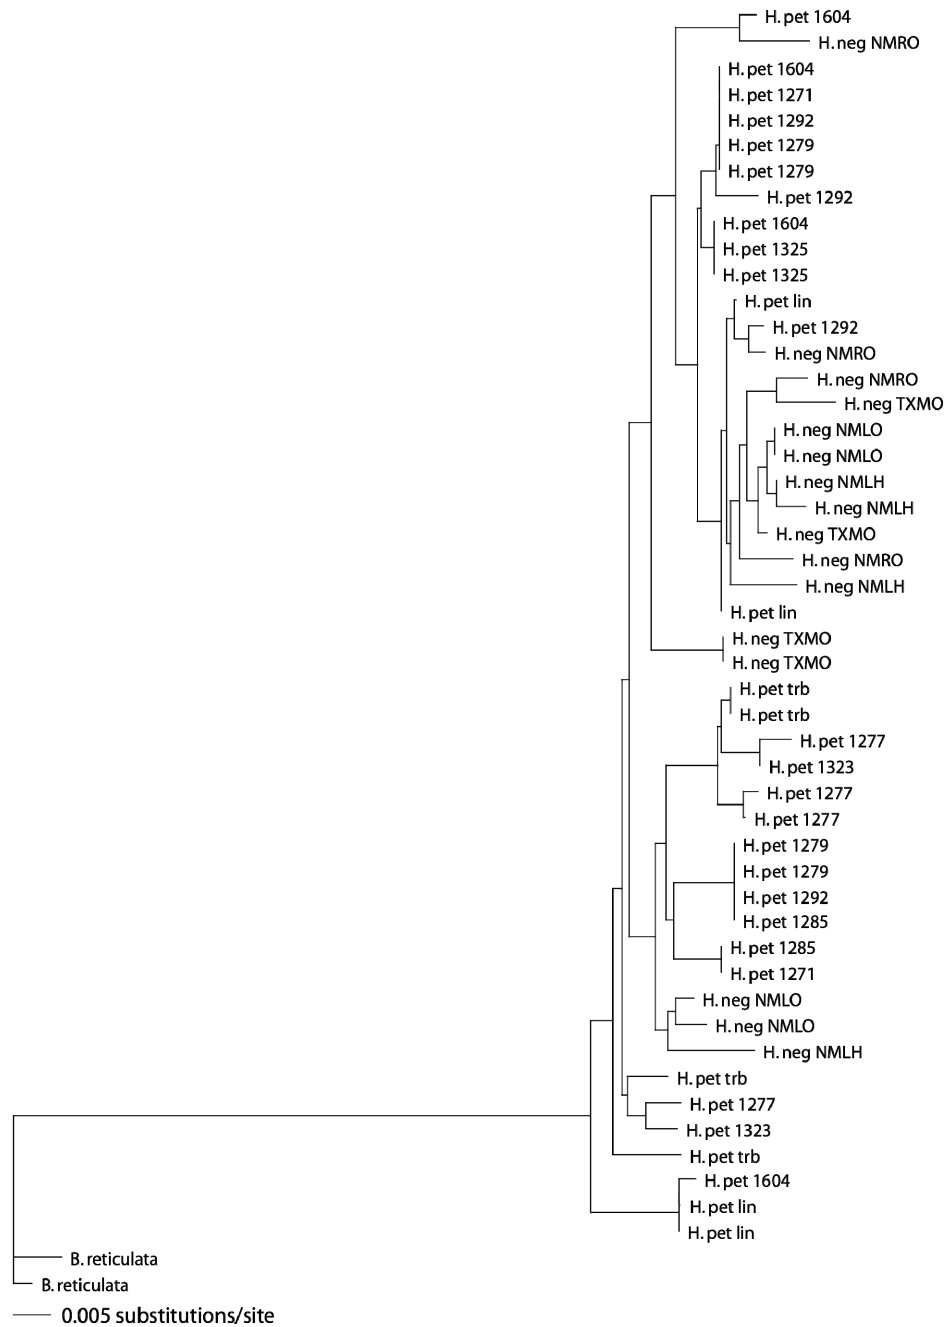

Locus (2213)

50% majority-rule bootstrap consensus neighbor

joining tree based on 1,000 replicates

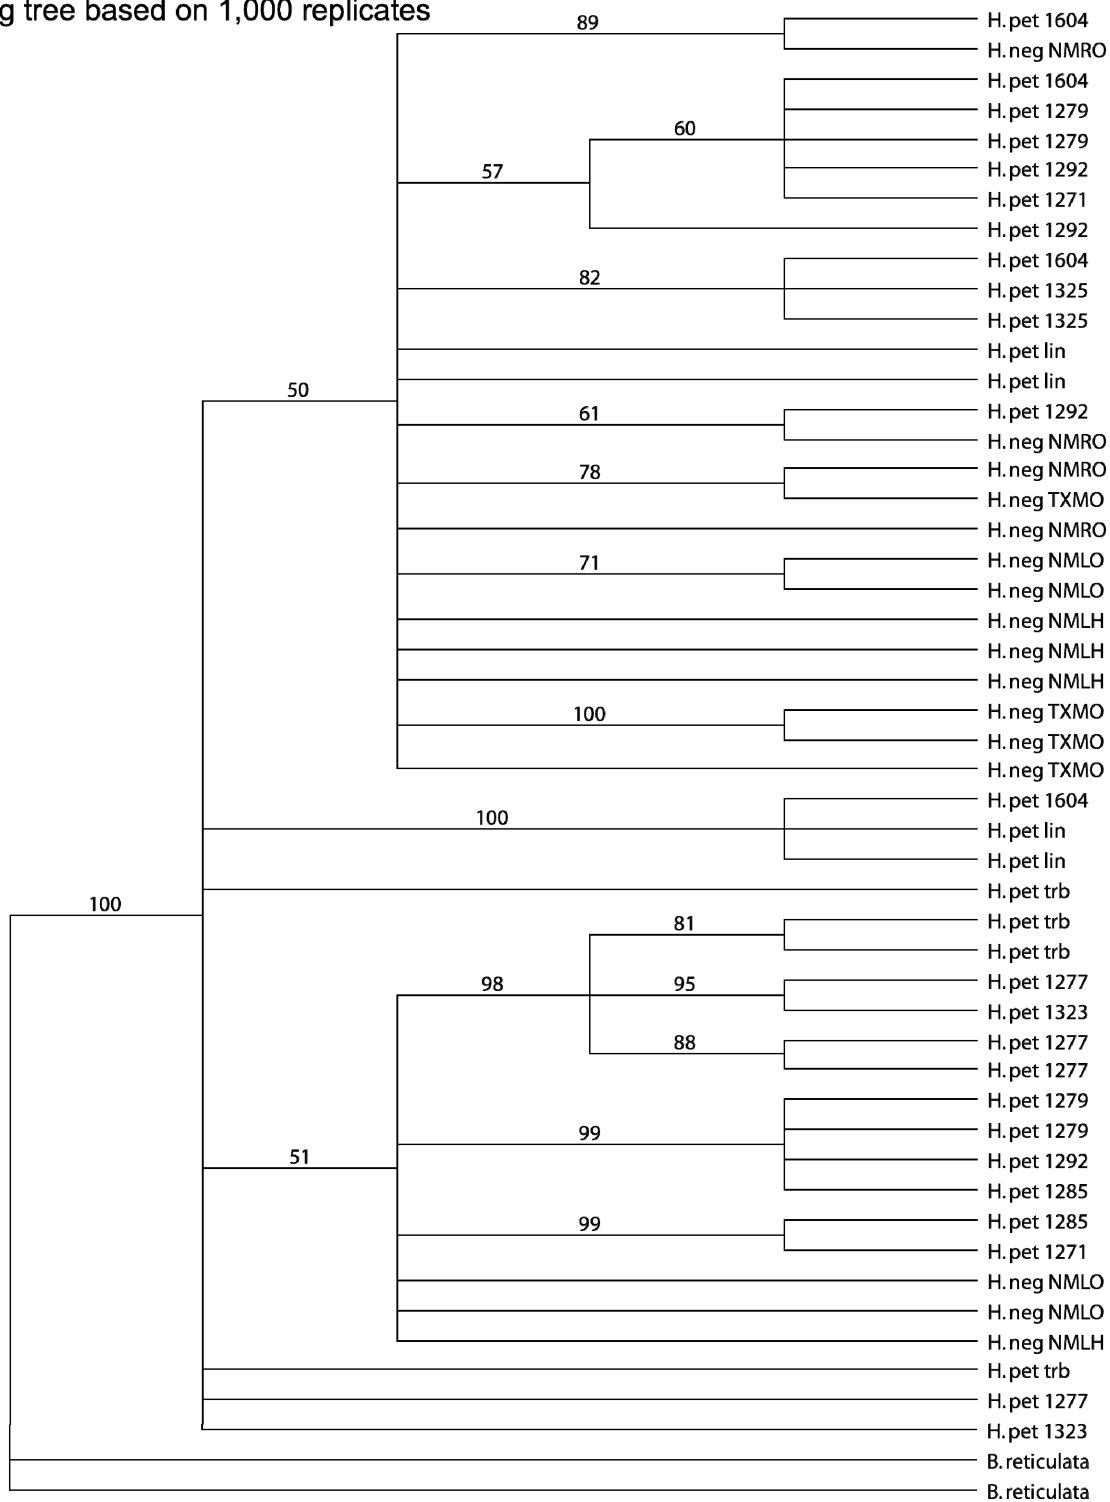

Locus JLS244  
neighbor joining tree

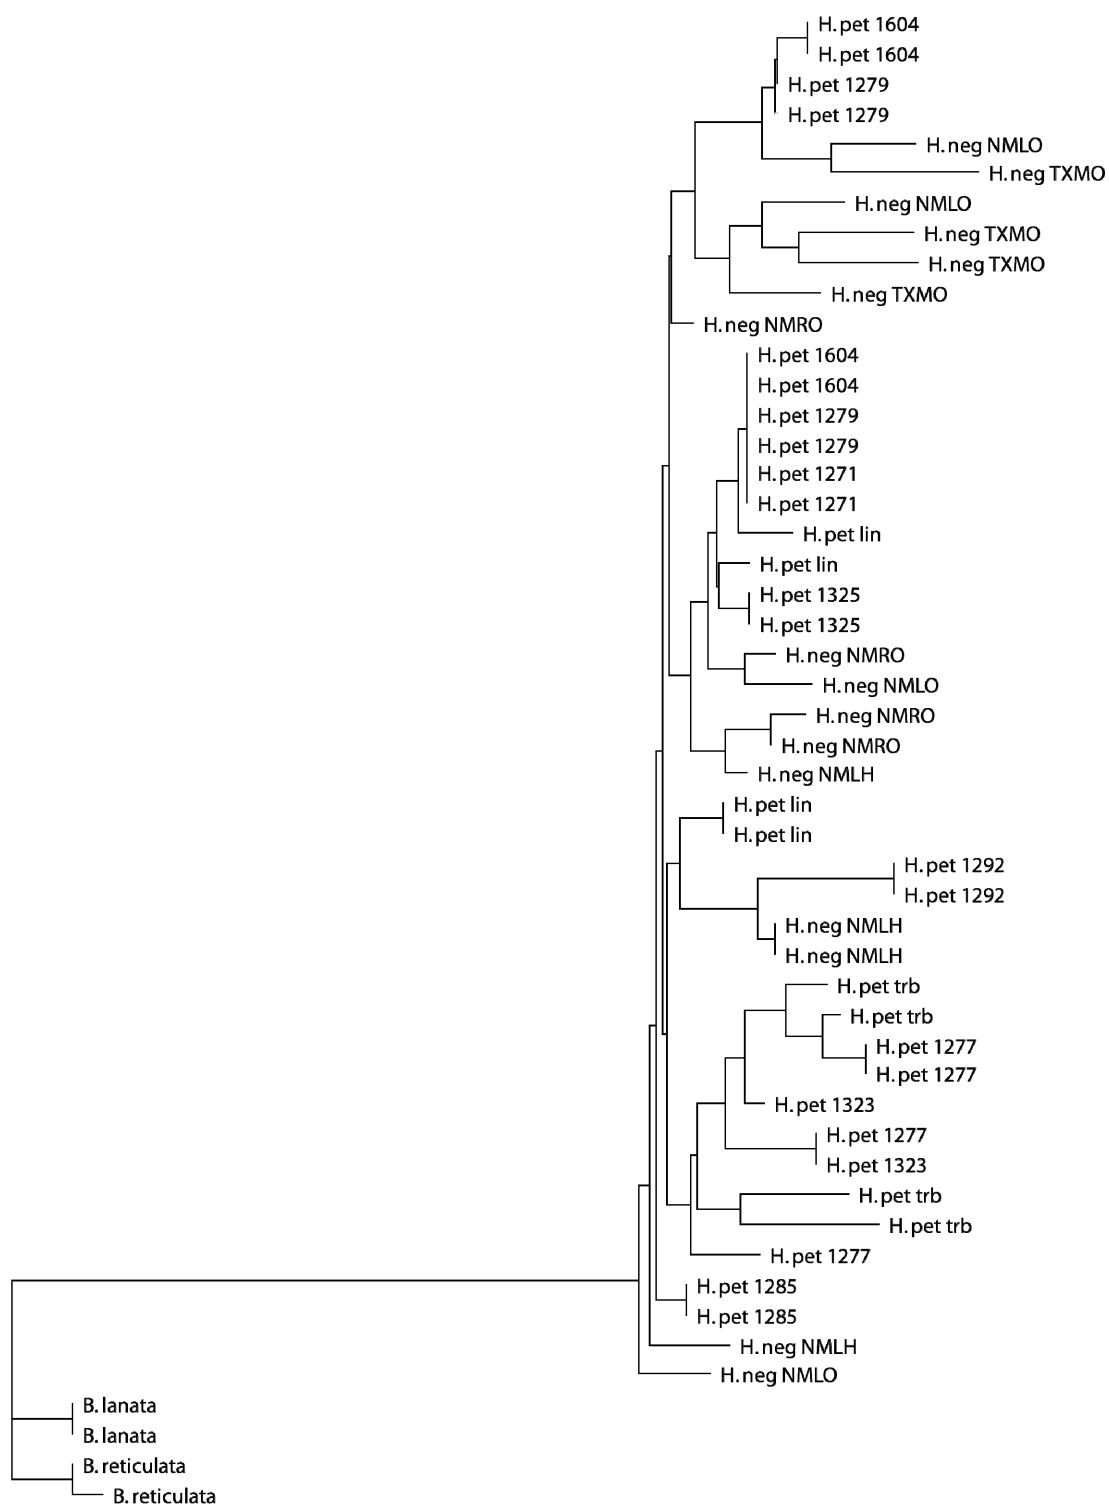

Locus JLS244  
50% majority-rule bootstrap consensus neighbor  
joining tree based on 1,000 replicates

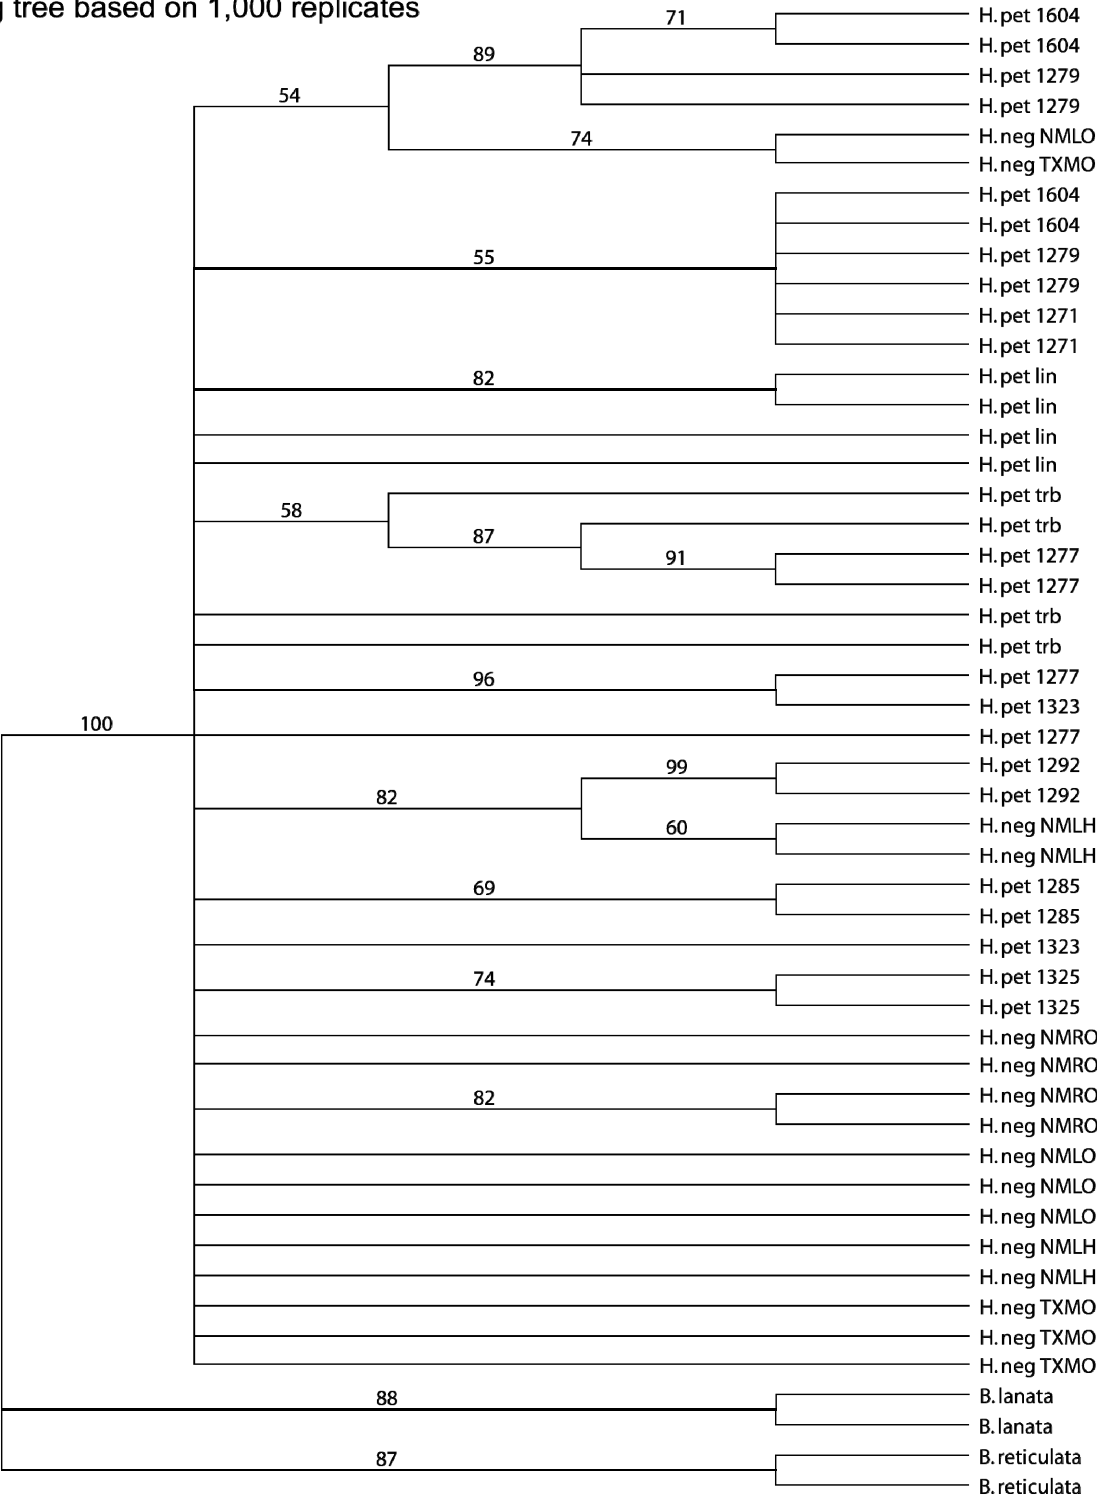

Locus JLS720  
neighbor joining tree

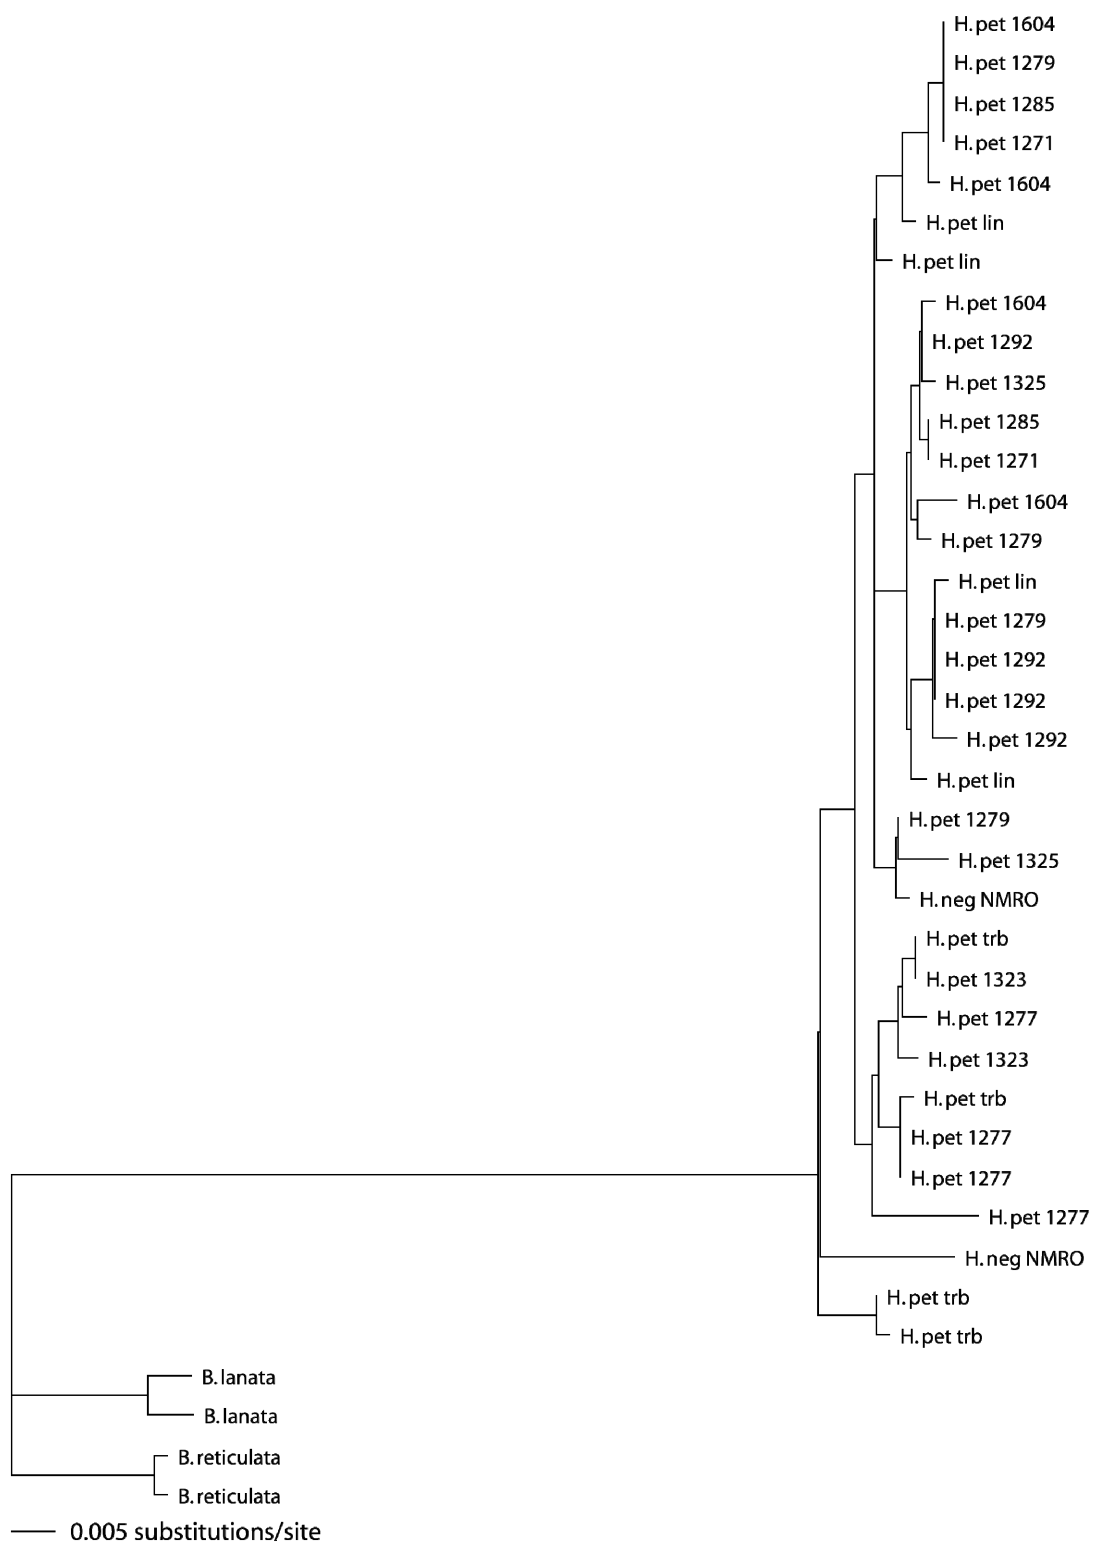

50% majority-rule bootstrap consensus neighbor joining tree based on 1,000 replicates

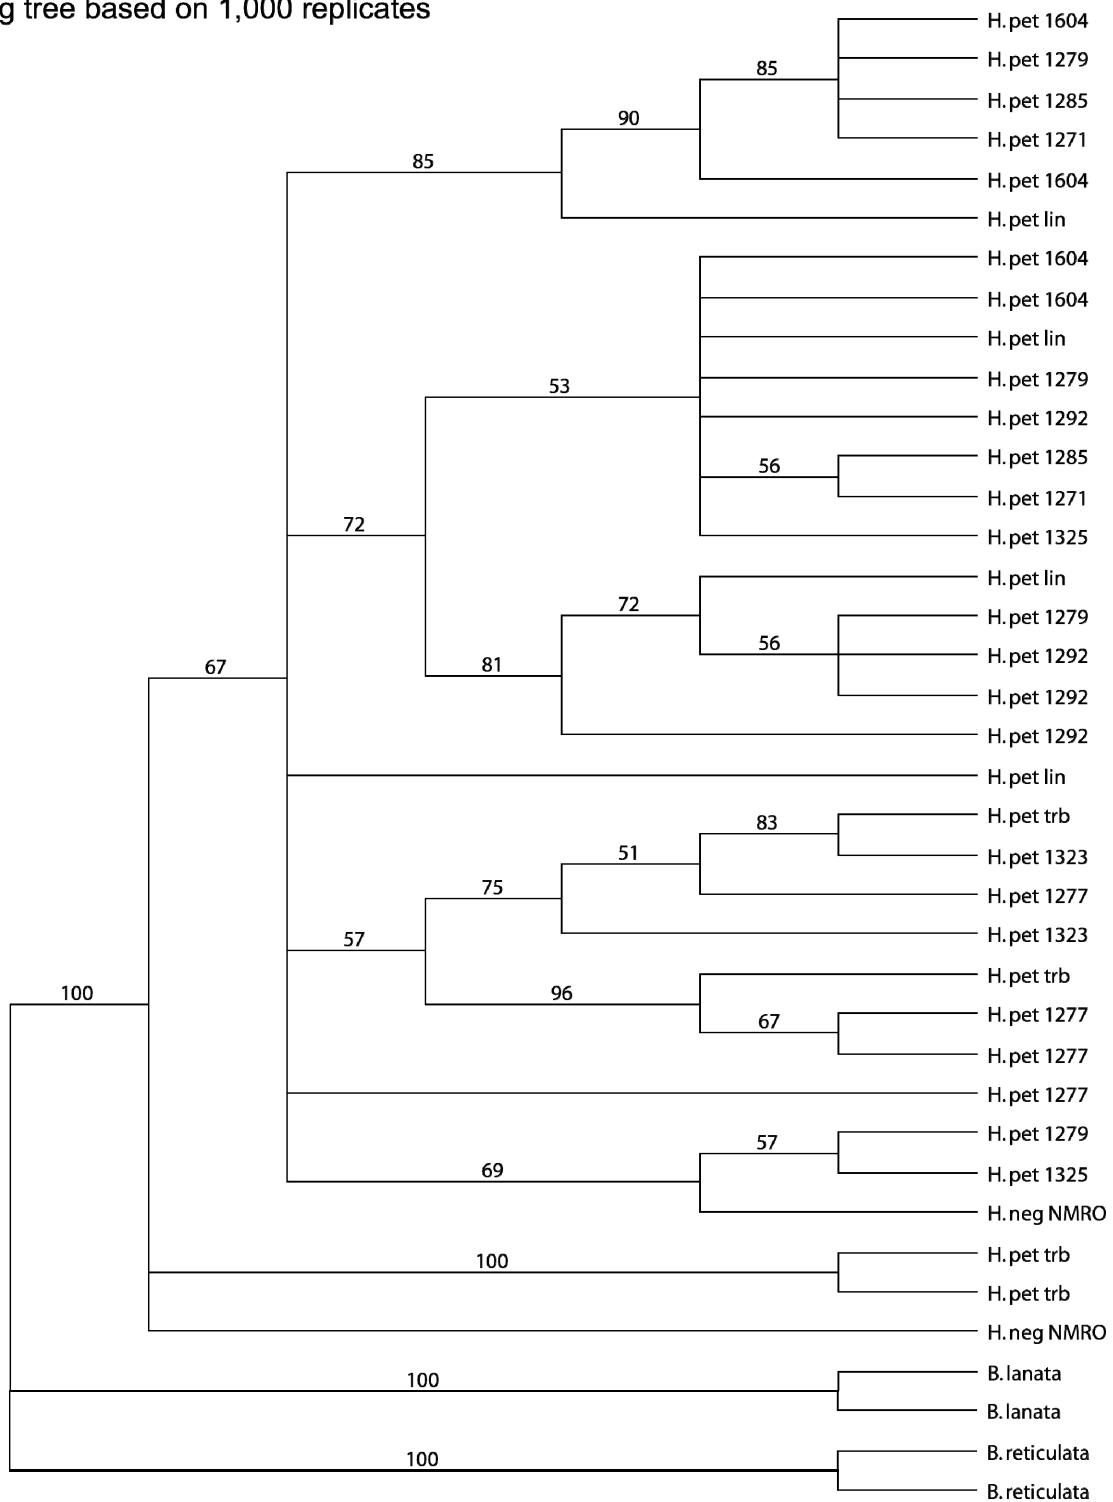

Locus JLS810R1  
neighbor joining tree

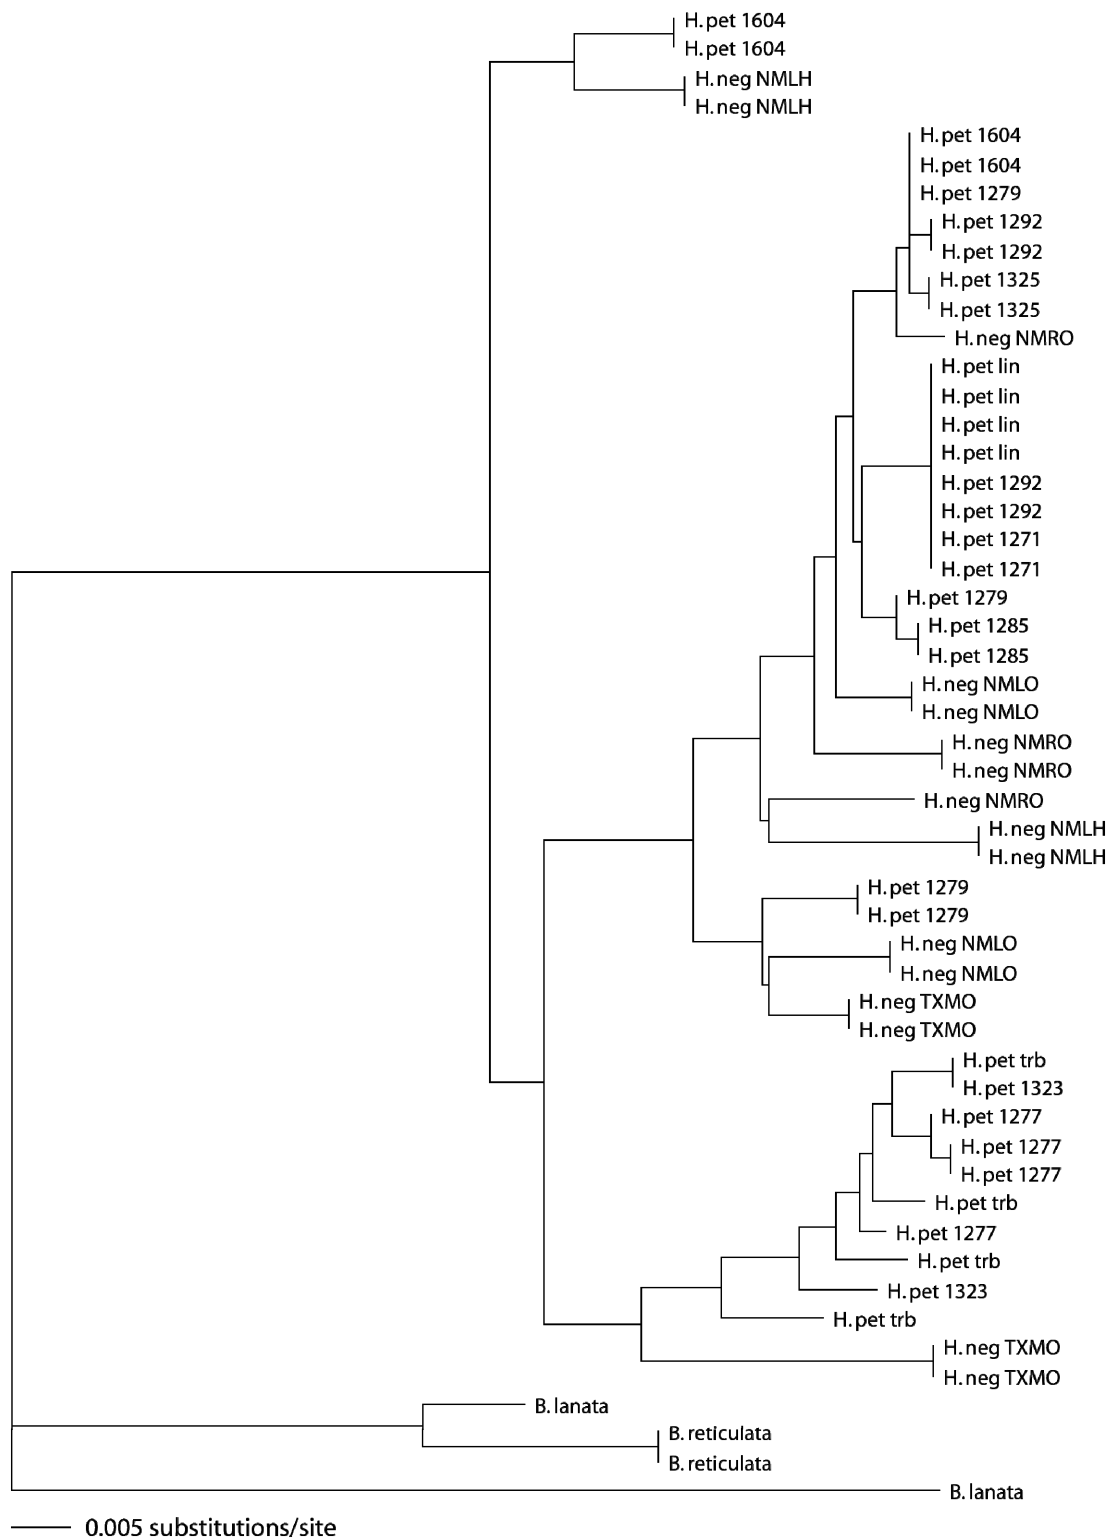

Locus JLS810R1  
50% majority-rule bootstrap consensus neighbor  
joining tree based on 1,000 replicates

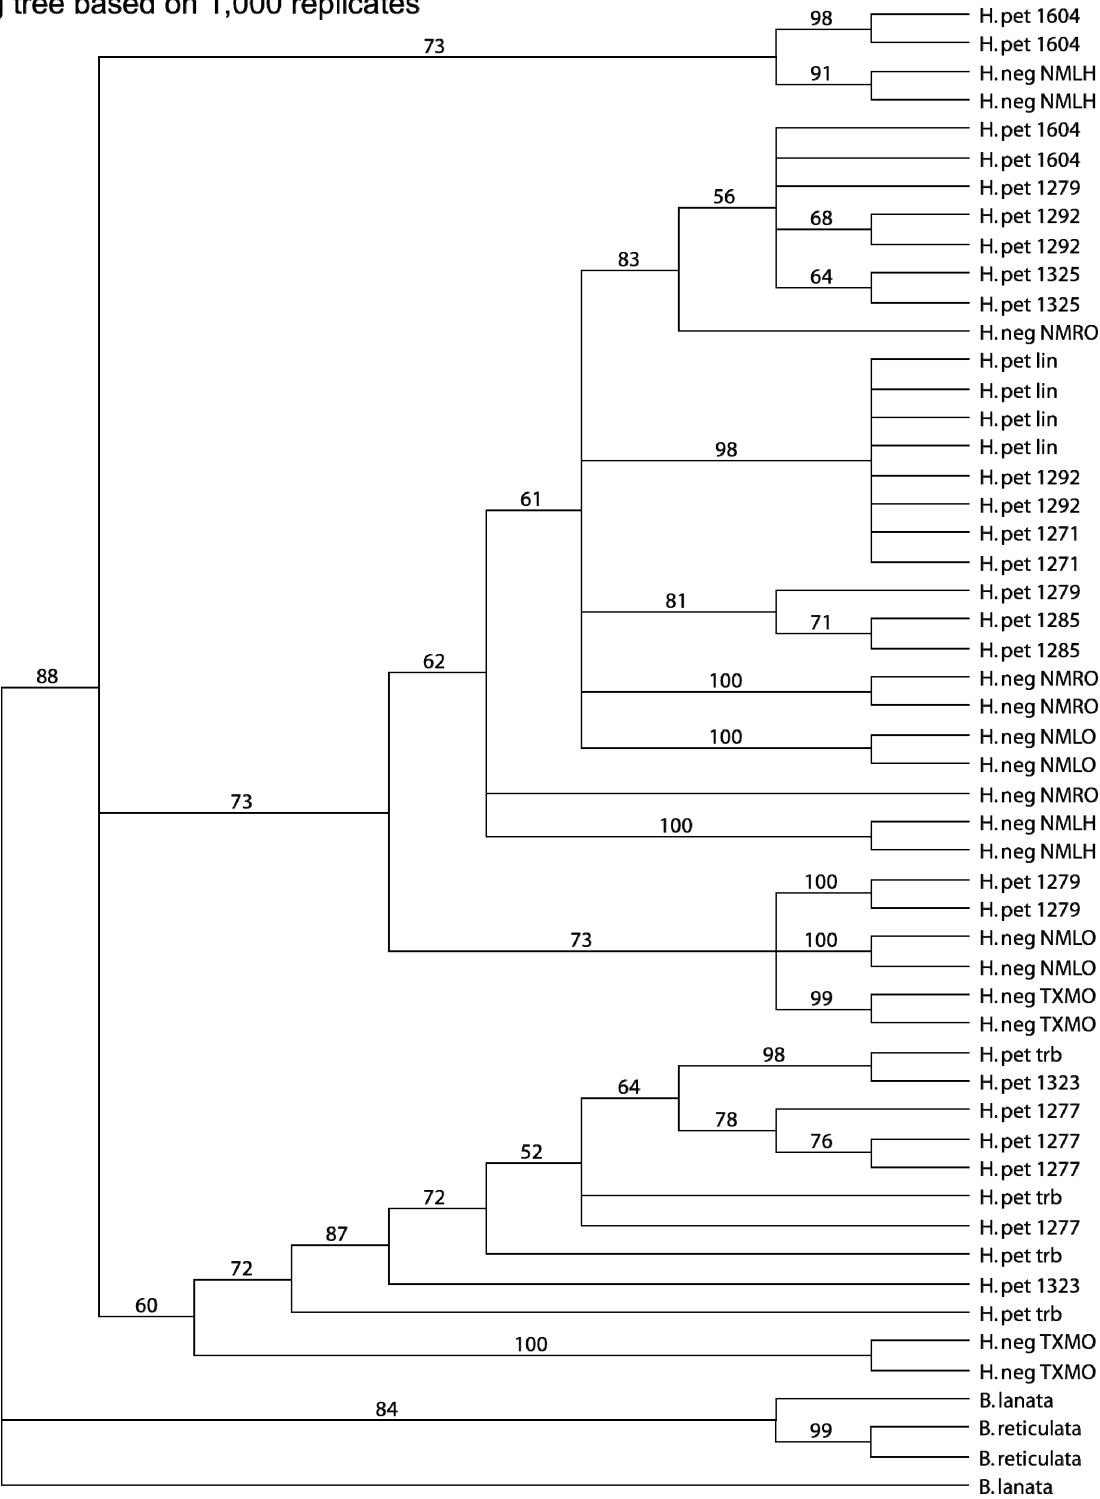



Locus JLS1040  
neighbor joining tree

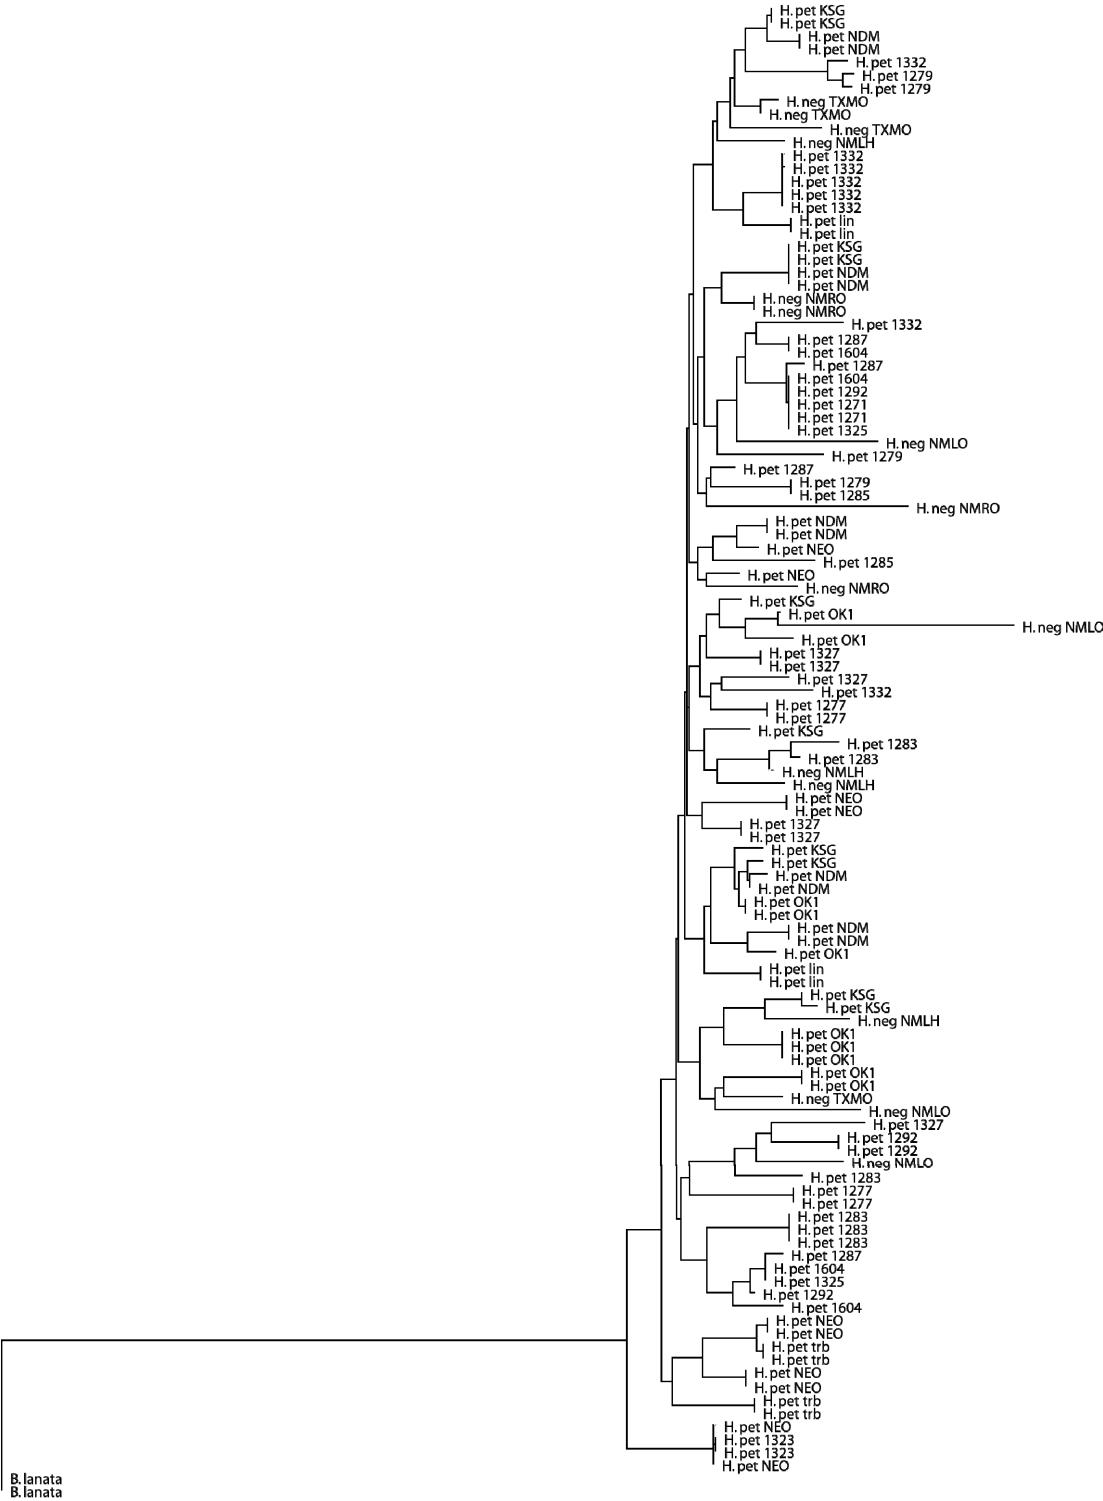

– 0.001 substitutions/site

50% majority-rule bootstrap consensus neighbor  
joining tree based on 1,000 replicates

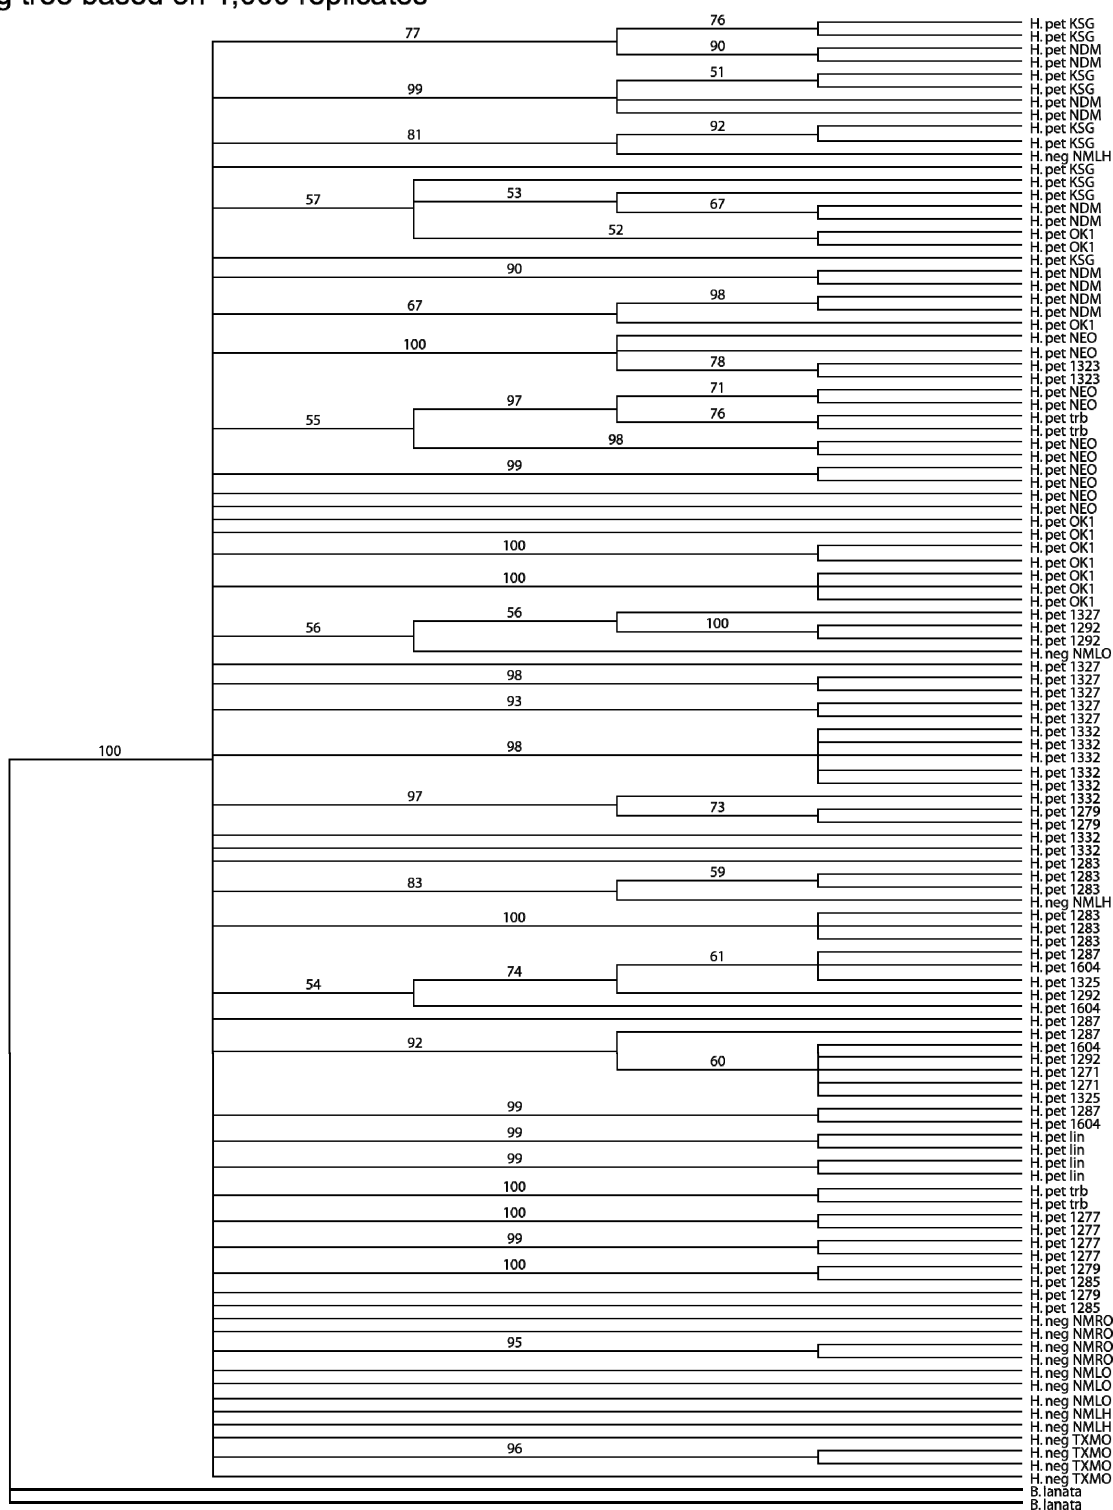

Locus JLS1615  
neighbor joining tree

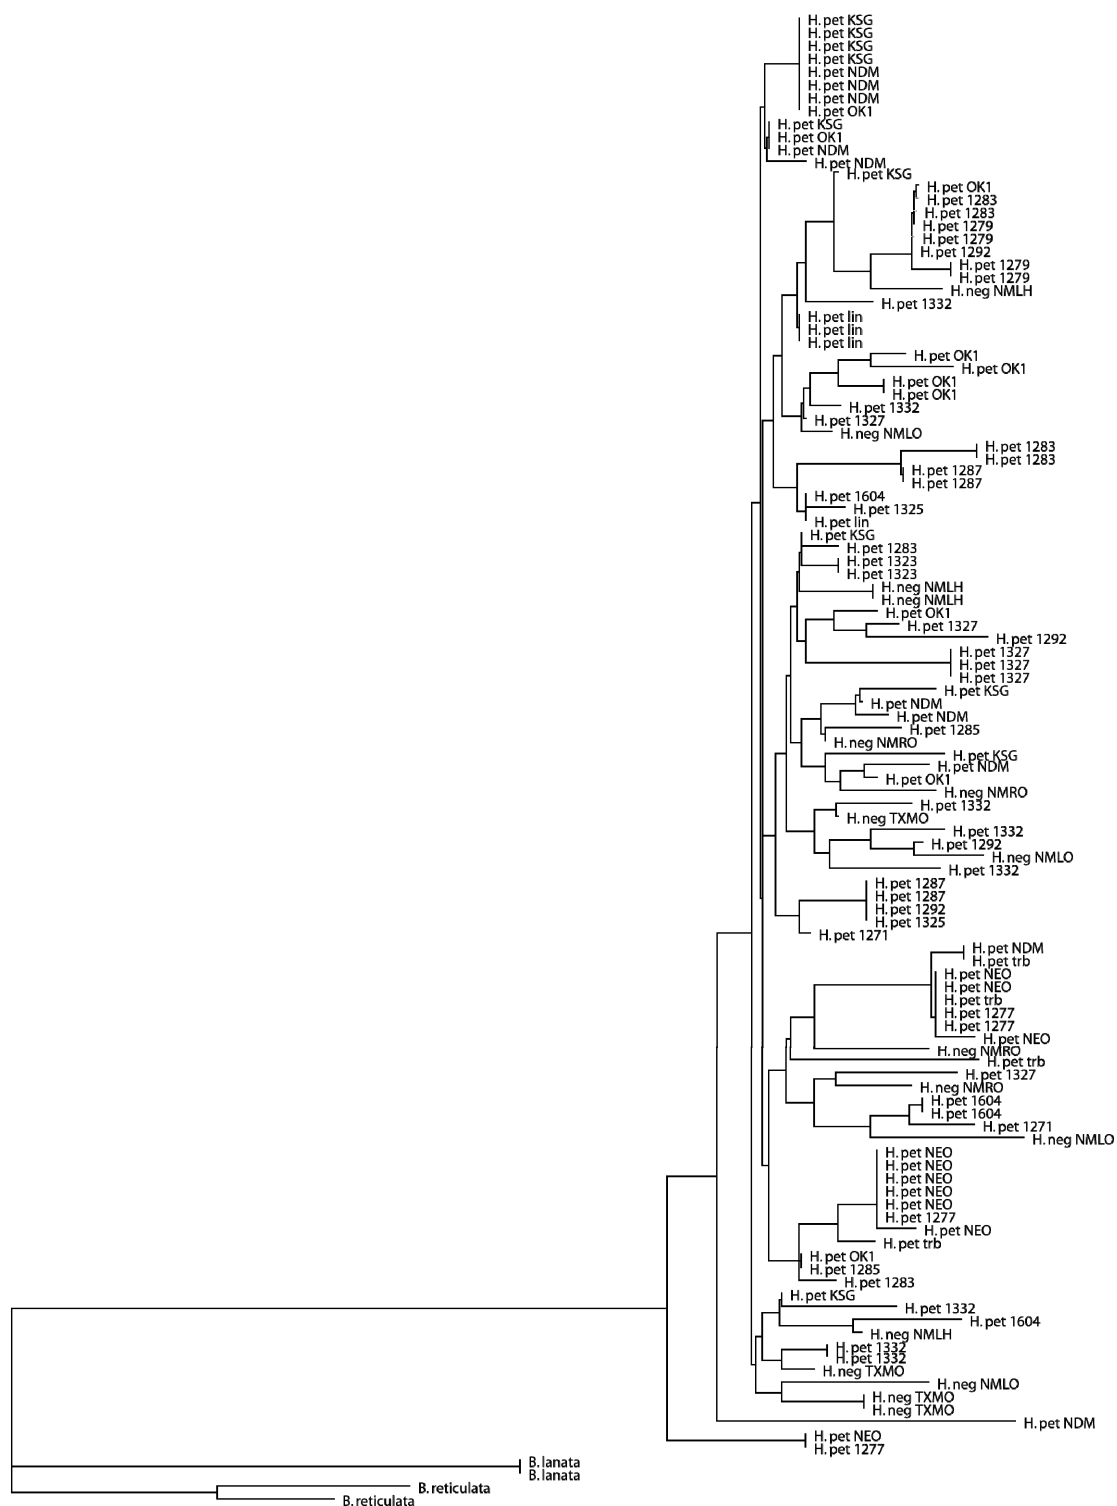

50% majority-rule bootstrap consensus neighbor joining tree based on 1,000 replicates

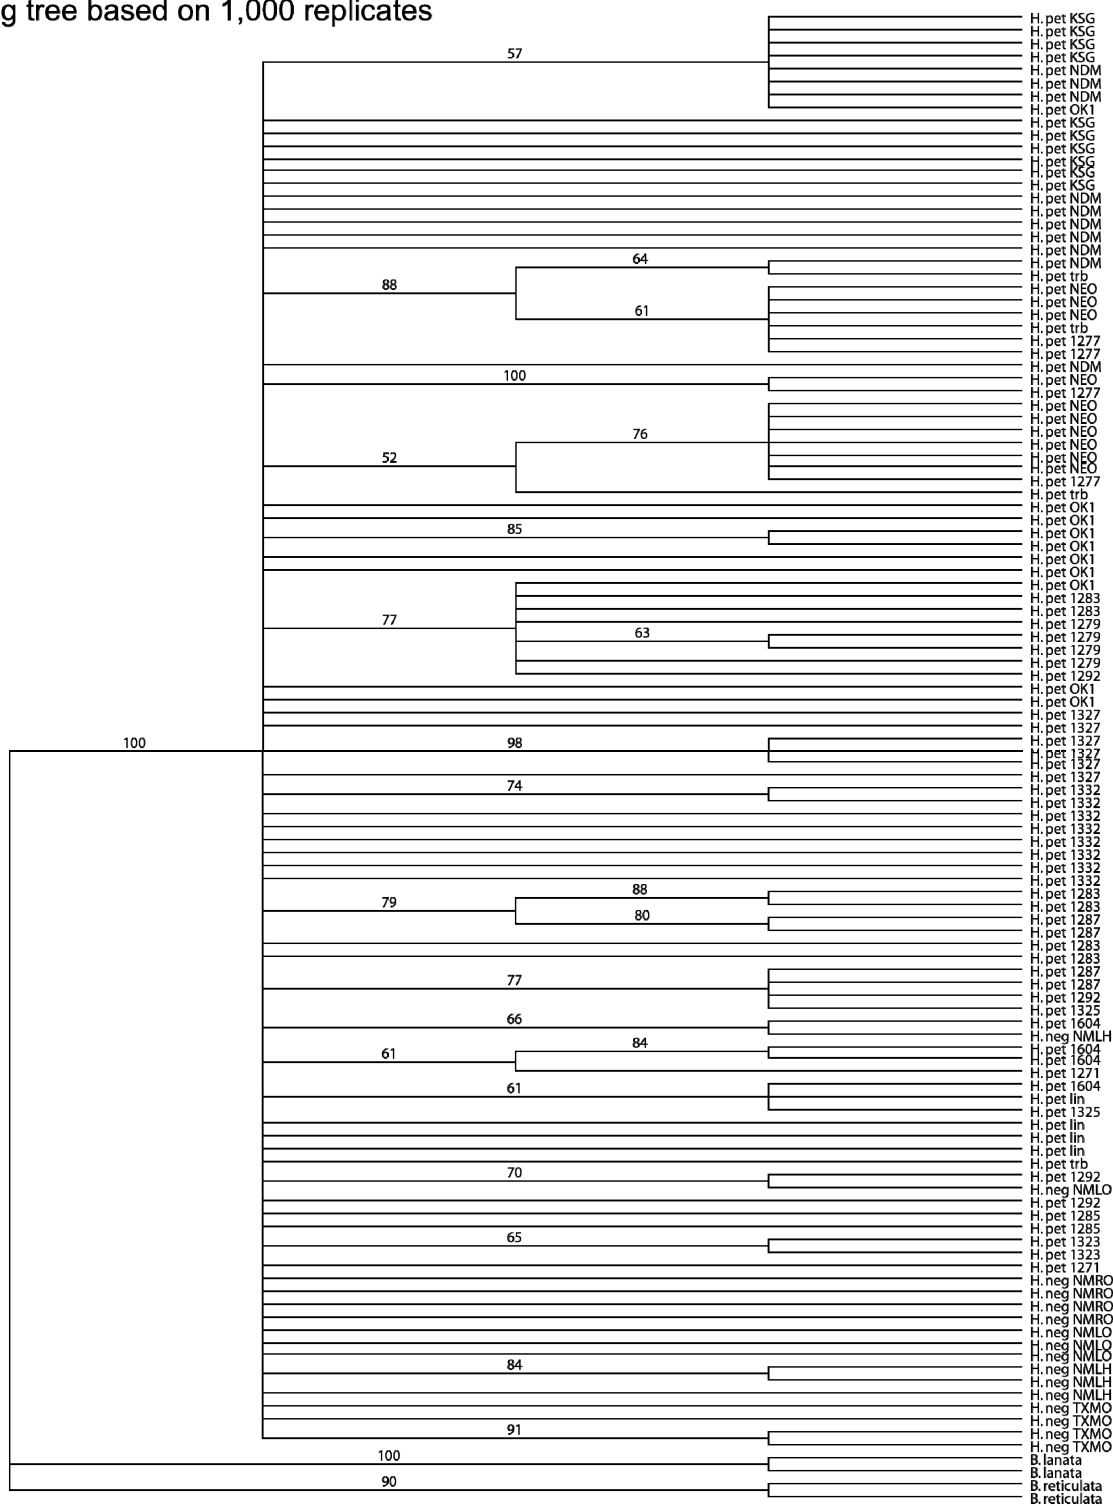

Locus JLS1747  
neighbor joining tree

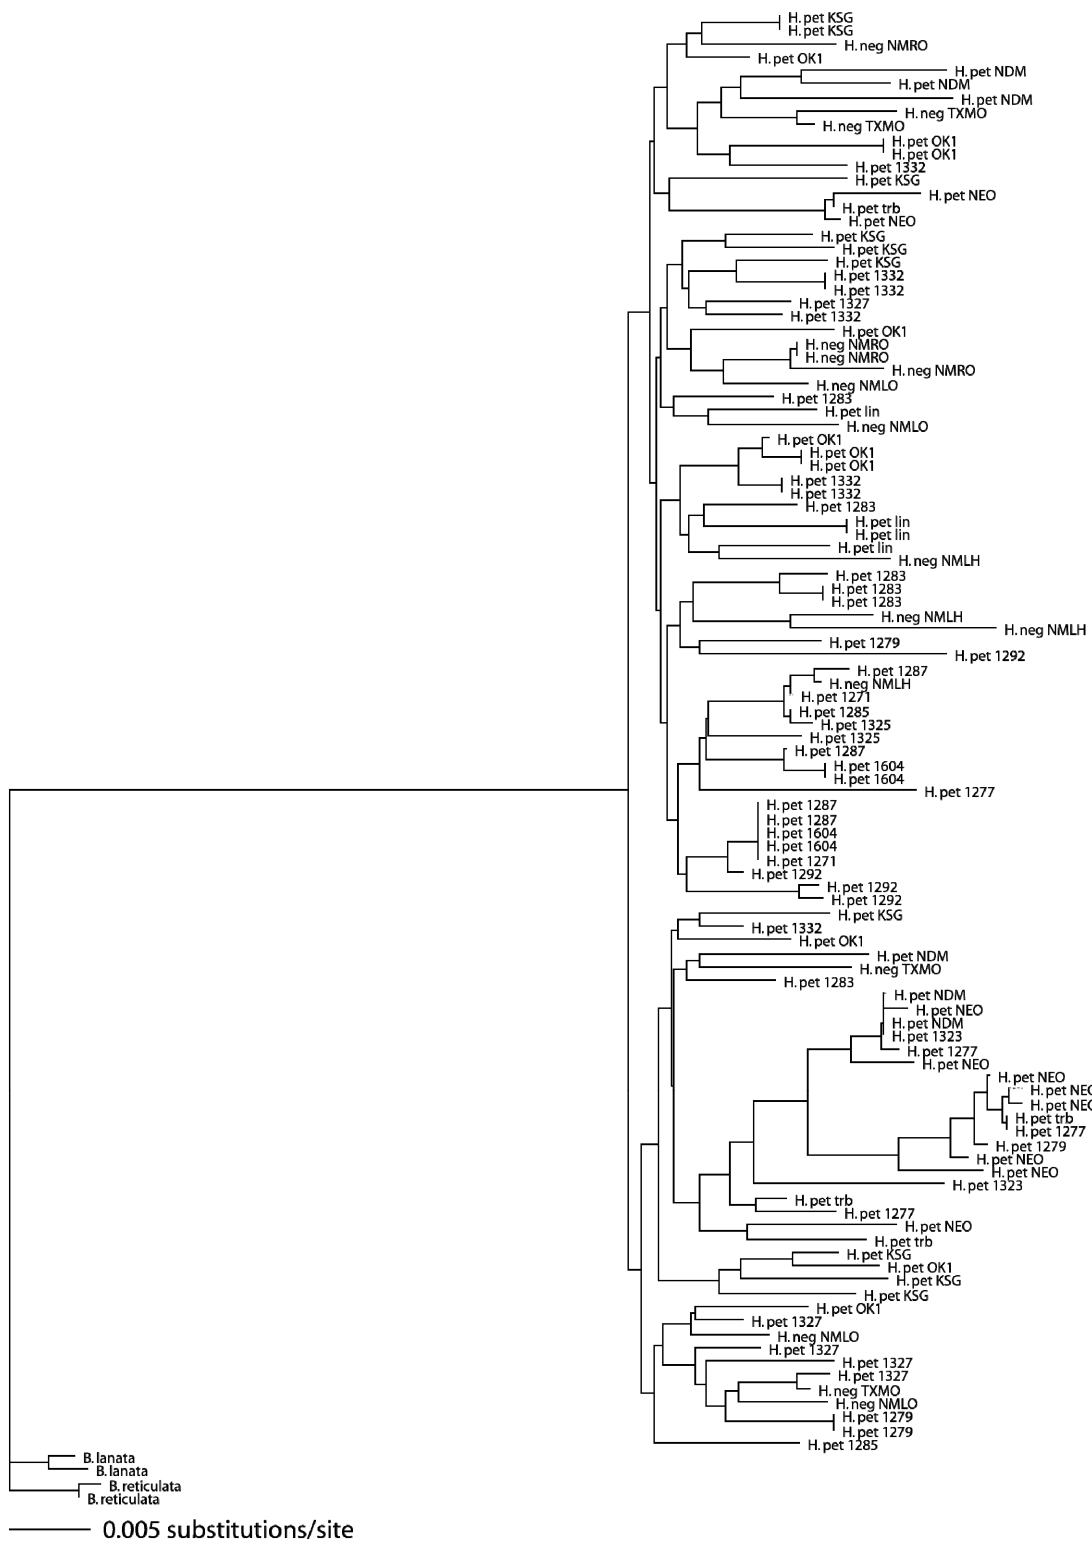

50% majority-rule bootstrap consensus neighbor joining tree based on 1,000 replicates

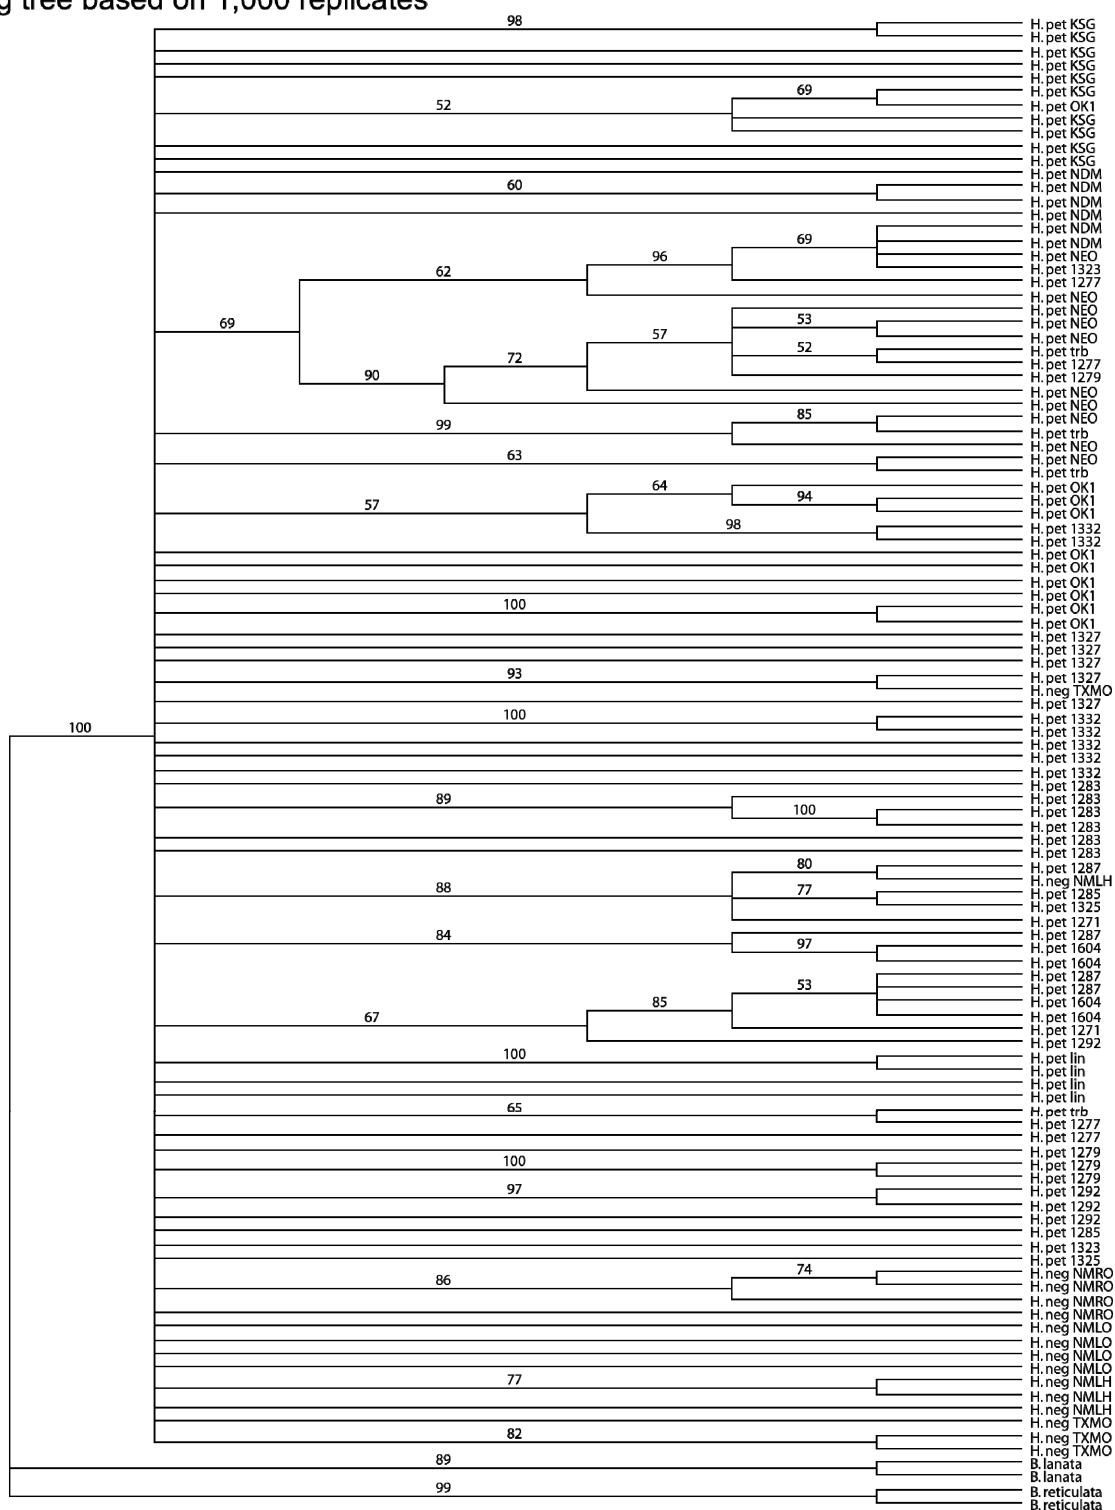

Locus JLS1953  
neighbor joining tree

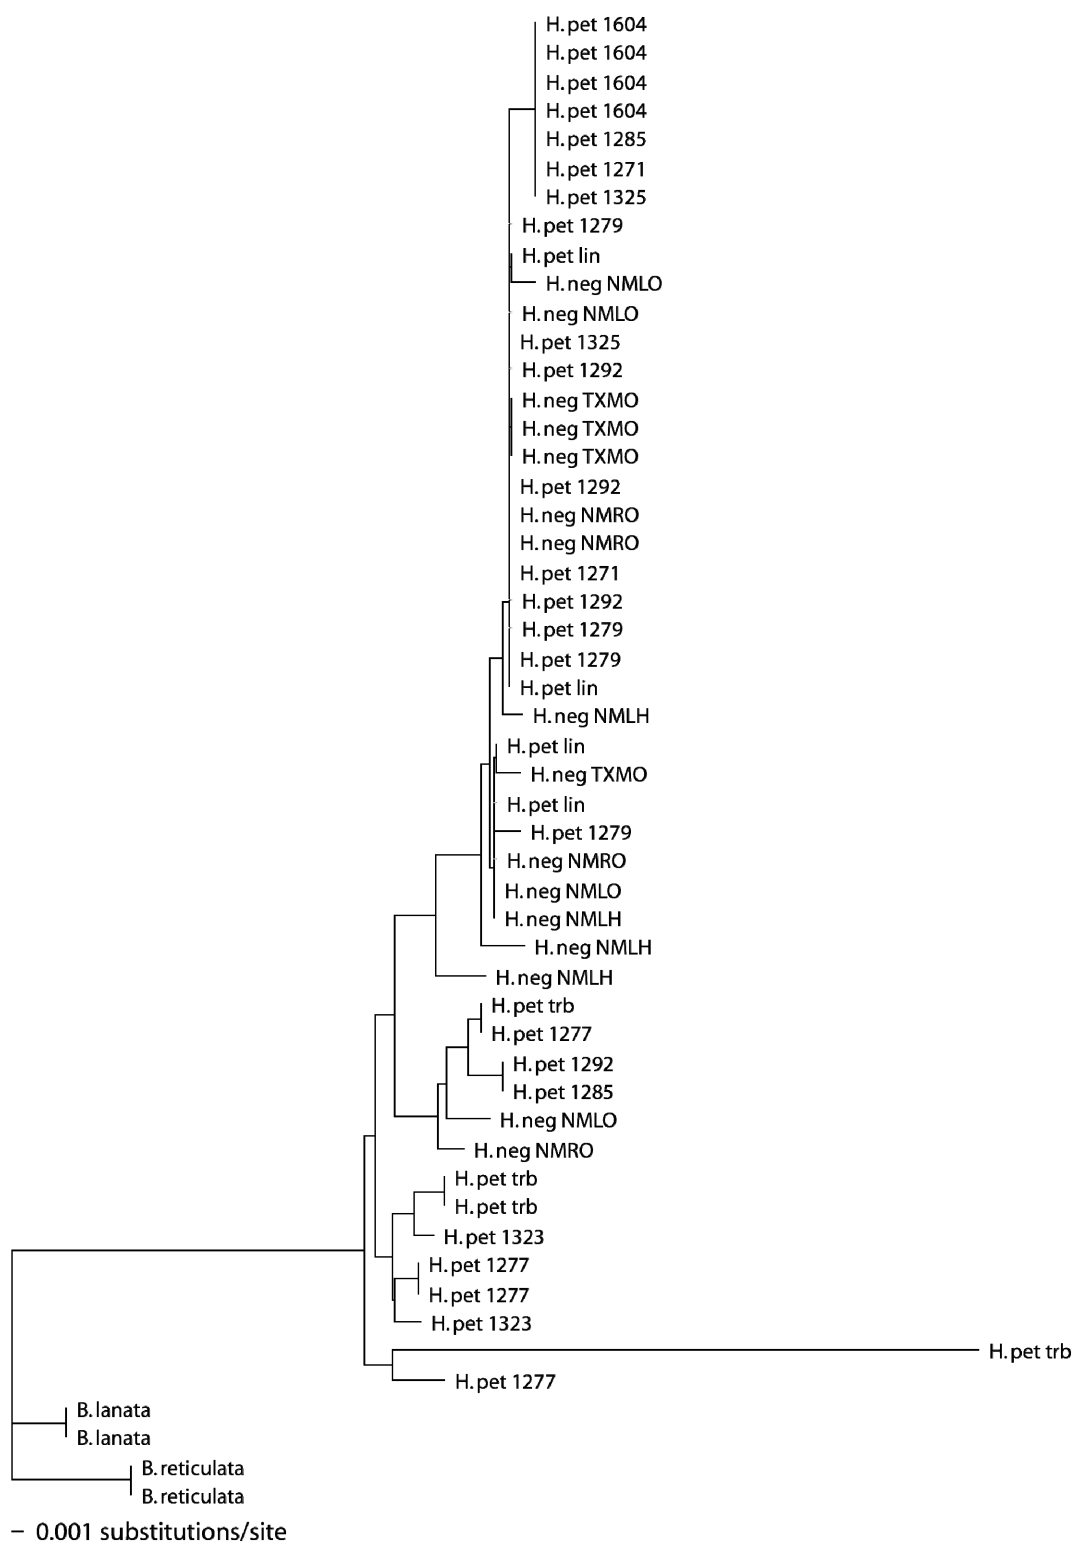

Locus JLS1953  
50% majority-rule bootstrap consensus neighbor  
joining tree based on 1,000 replicates

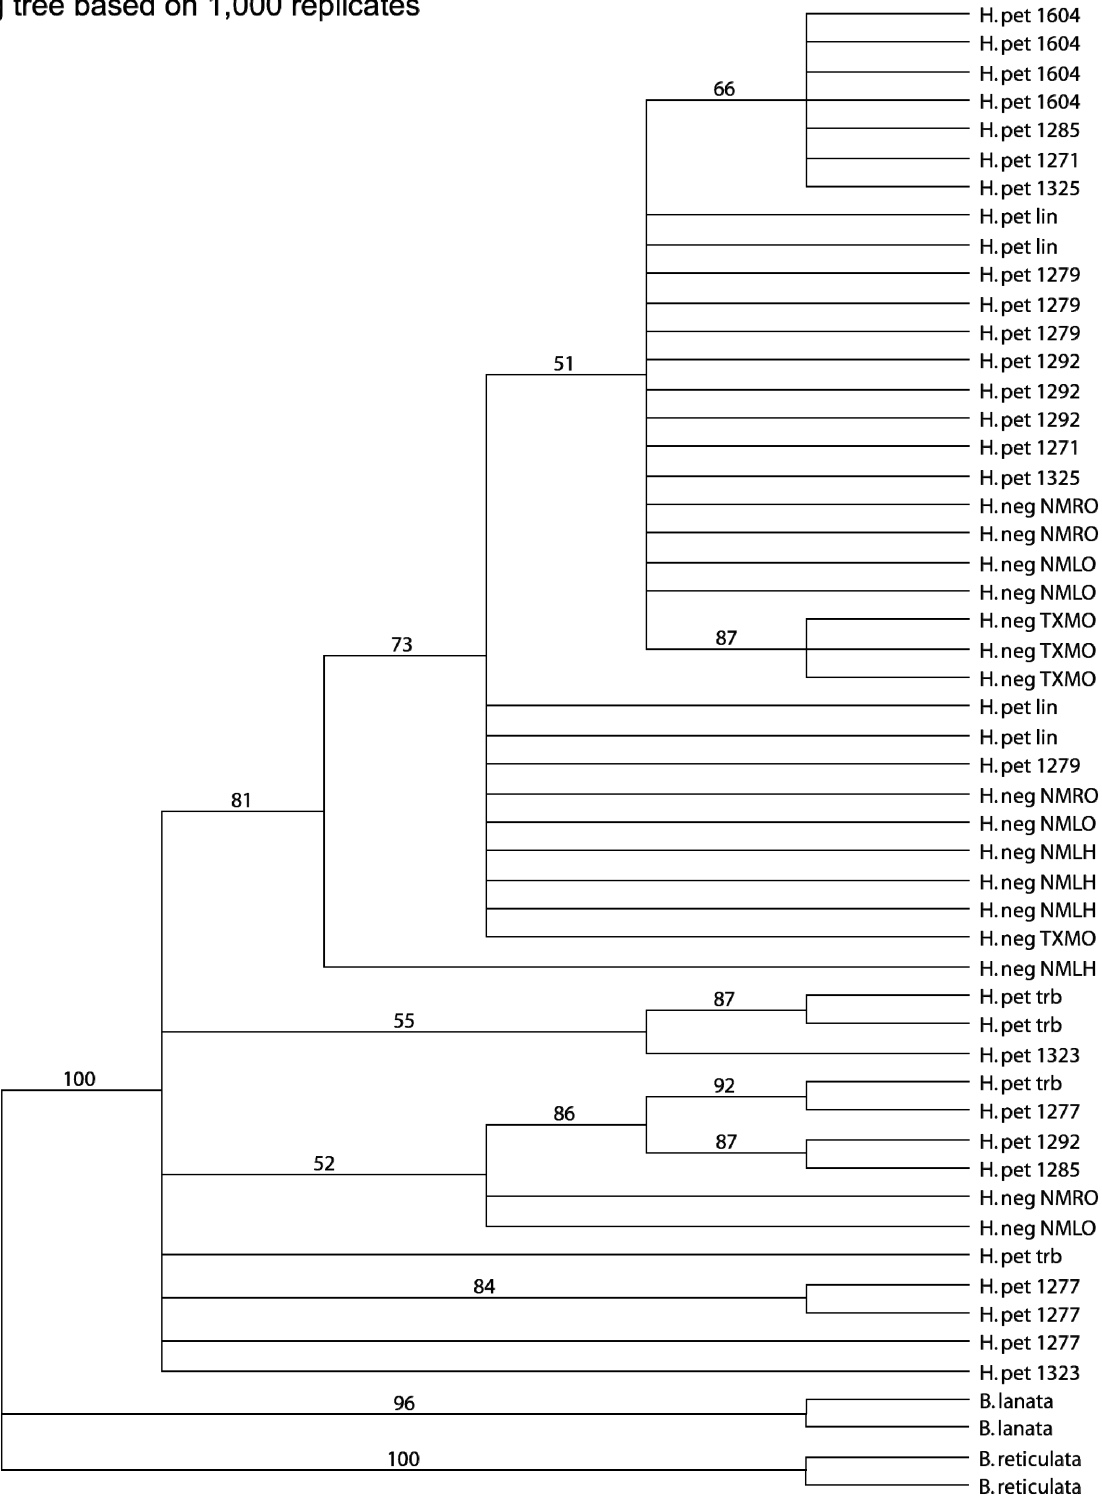



Locus JLS2899  
neighbor joining tree

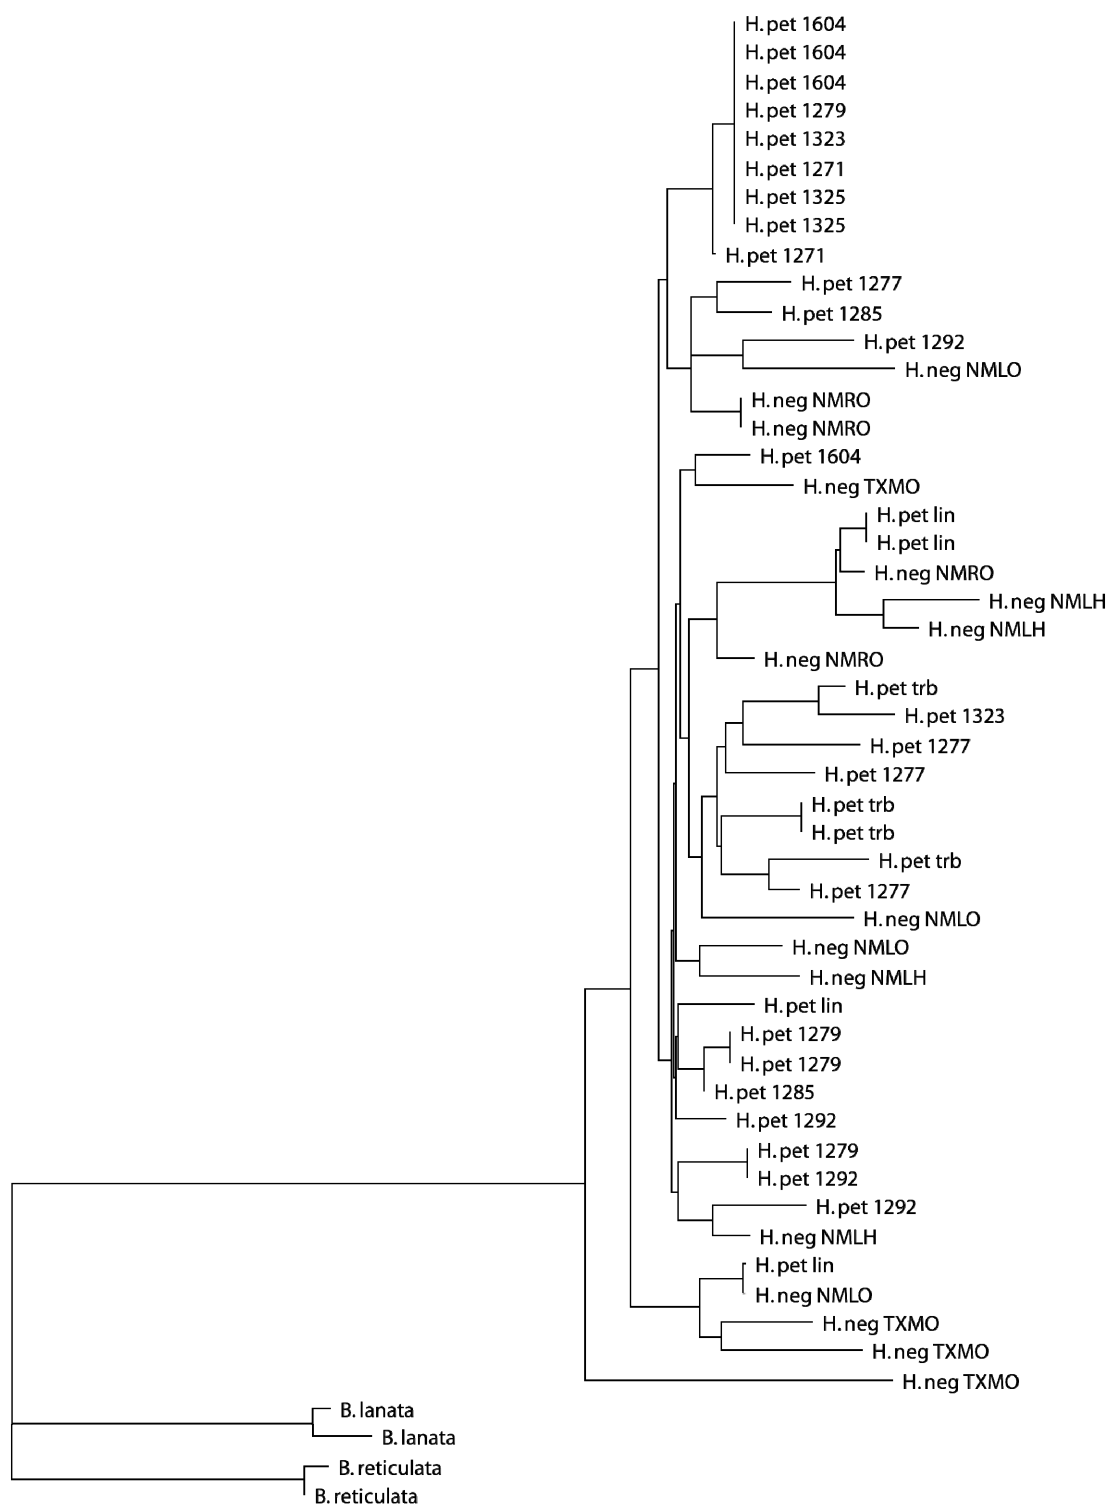

Locus JLS2899  
50% majority-rule bootstrap consensus neighbor  
joining tree based on 1,000 replicates

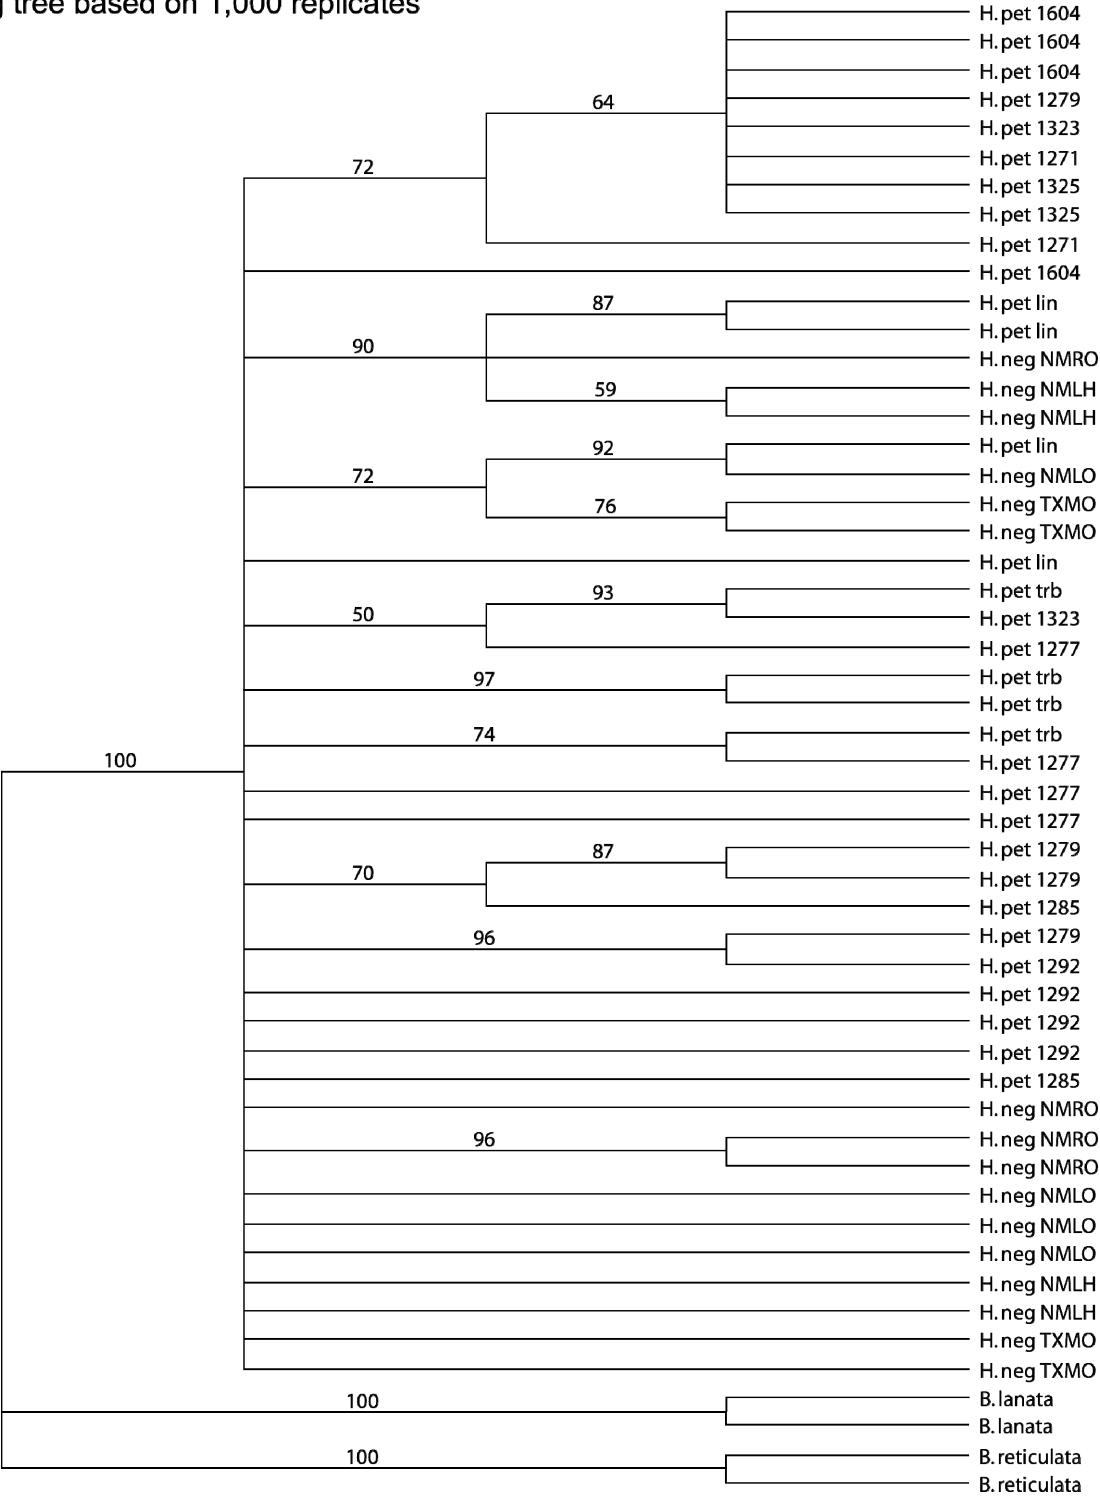

Supplement: s1 [file s1]
